# Supplementary material for: SFRP4+ stromal cell subpopulation with IGF1 signaling in human endometrial regeneration
Source: PubMed Central journal article supplement (PMC9512788; doi:10.1038/s41421-022-00438-7), 2022-09-27
Supplement: 41421_2022_438_MOESM1_ESM.pdf [file 41421_2022_438_MOESM1_ESM.pdf]

1 **Supplementary Figures:**

2 **Supplementary Figure S1. Quality control of single cell profiling and unbiased**

3 **clustering.** The number of counts, feature and mitochondrial counts of each cell from

4 the proliferative (NP) and secretory (NS) phase uterus samples before (a & c) and after

5 (b & d) the data were filtered. Then we selected most variable expressed genes by

6 selecting the most variable principal component (PC) (e) to perform graph-based

7 clustering of the combined dataset. (f). The potential doublet of the single cell data was

8 detected using DoubleFinder.

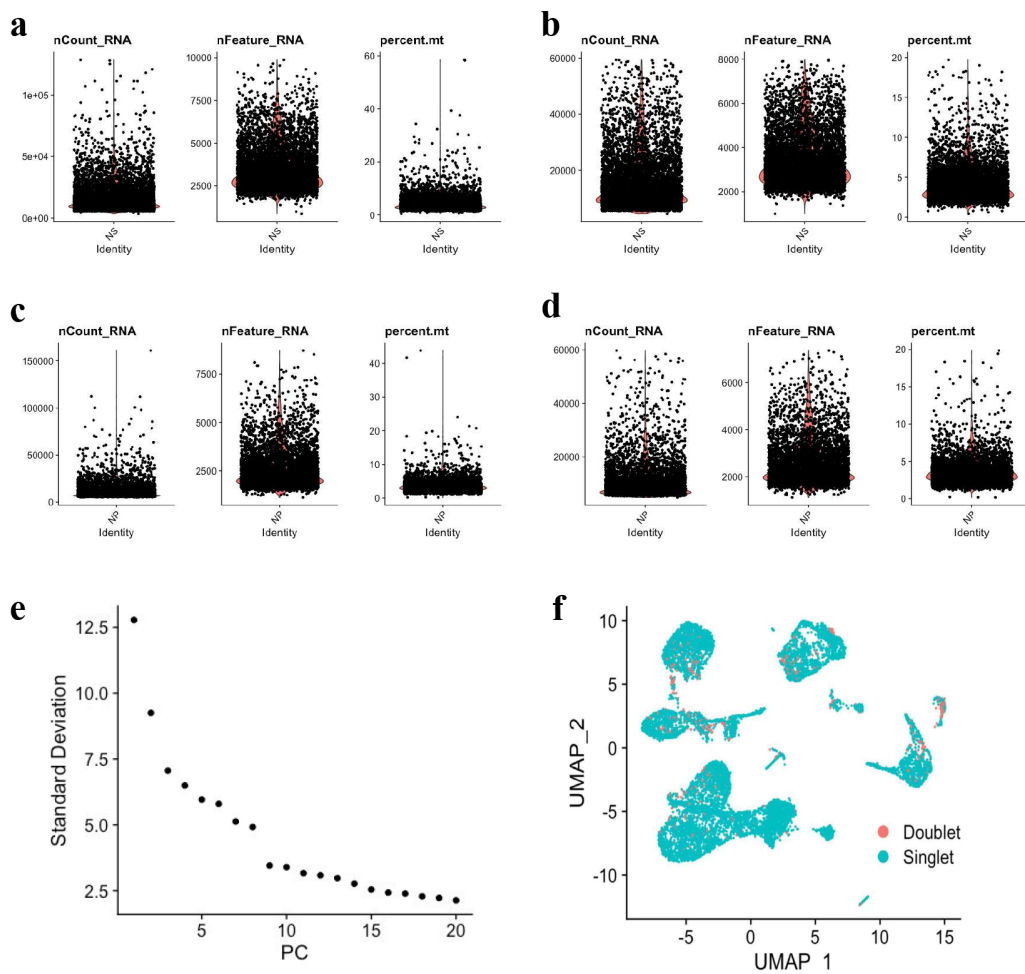

9

10

1 **Supplementary Figure S2. Heterogeneity of uterine cell populations. (a)** (left)  
2 UMAP plot of 5 uterus epithelial cell sub-populations using Seurat. Heatmap shows  
3 specifically expressed gene signature of 5 uterus epithelial cell sub-populations. (right)  
4 Gene ontology (GO) analysis of the specifically expressed gene signature of each sub-  
5 population from epithelial cells. **(b)** (left) UMAP plot of 2 uterus endothelia cell sub-  
6 populations using Seurat. Heatmap shows specifically expressed gene signature of each  
7 sub-population from endothelia cells. (right) GO analysis of the specifically expressed  
8 gene signature of each sub-population from endothelia cells. **(c)** (left) UMAP plot of 4  
9 uterus vascular smooth muscle cell sub-populations using Seurat. Heatmap shows  
10 specifically expressed gene signature of each vascular smooth muscle cell sub-  
11 population. (right) GO analysis of the specifically expressed gene signature of each  
12 vascular smooth muscle cell. **(d)** (left) UMAP plot of uterus immune cell sub-  
13 populations using Seurat. Heatmap shows specifically expressed gene signature of sub-  
14 populations from immune cells. (right) GO analysis of the specifically expressed gene  
15 signature of the immune cell sub-populations. **(e)** (left) UMAP plot of uterus  
16 myometrial smooth muscle cell sub-populations using Seurat. Heatmap shows  
17 specifically expressed gene signature of 3 myometrial smooth muscle cell sub-  
18 populations. (right) GO analysis of the specifically expressed gene signature of the  
19 three myometrial smooth muscle cell sub-populations.

20

21

22

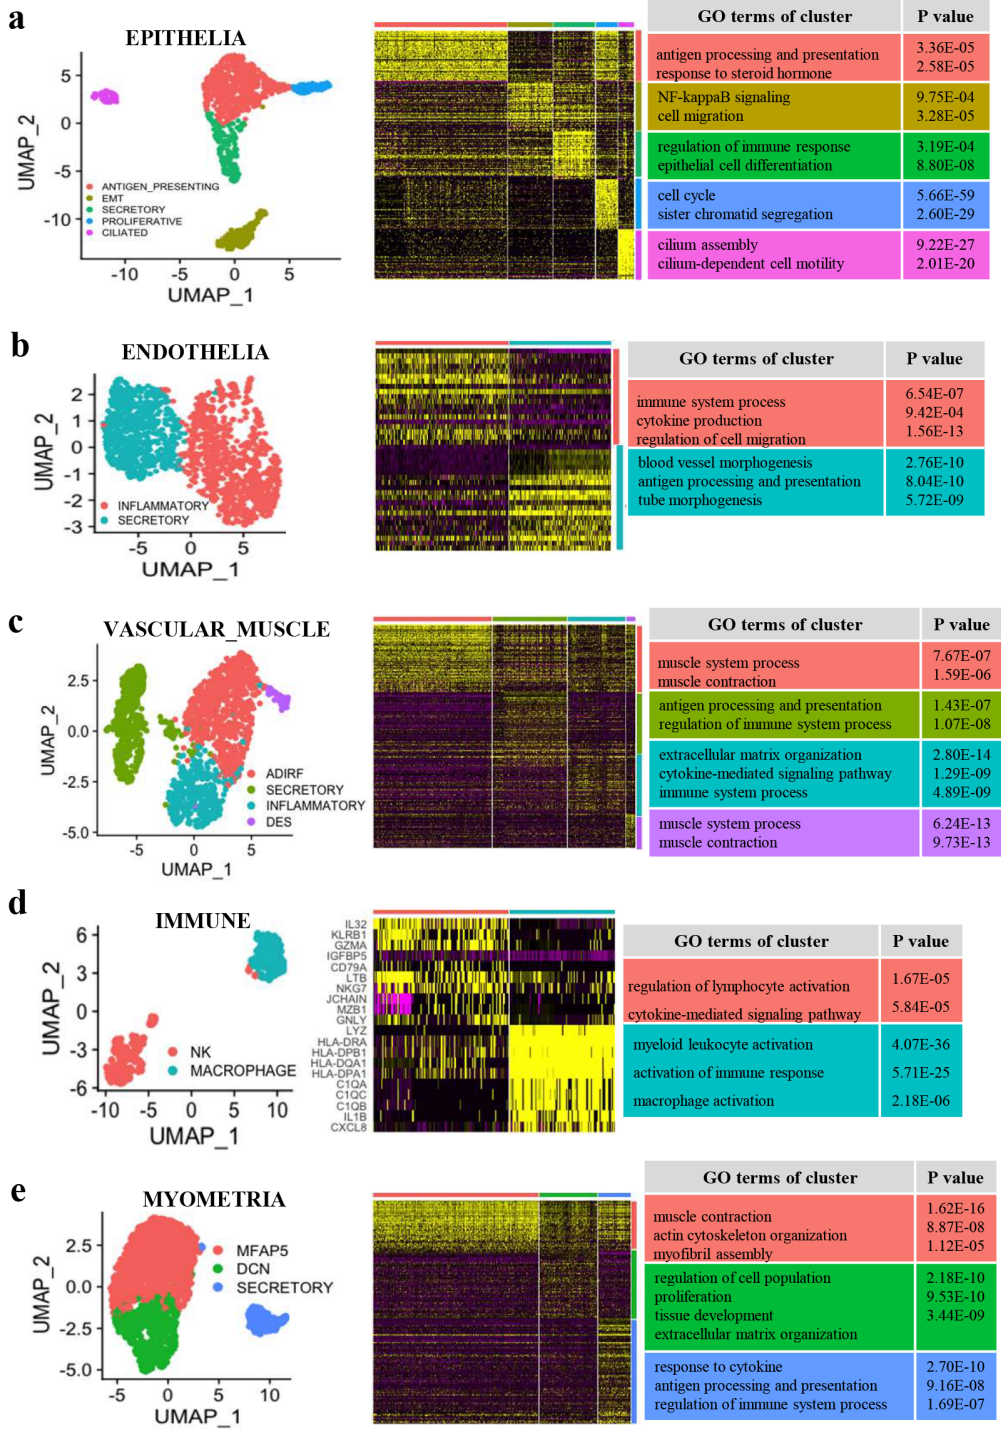

1

2

3

4

5

1 **Supplementary Figure S3. Flowchart shows deconvolution analysis** was conducted  
2 using marker genes of each subpopulation generated in our cell atlas as gene set, and  
3 calculate the relative proportional score of each subpopulation in endometria during the  
4 menstrual cycle from another transcriptional dataset of the human endometria during  
5 the menstrual cycle (GSE4888).

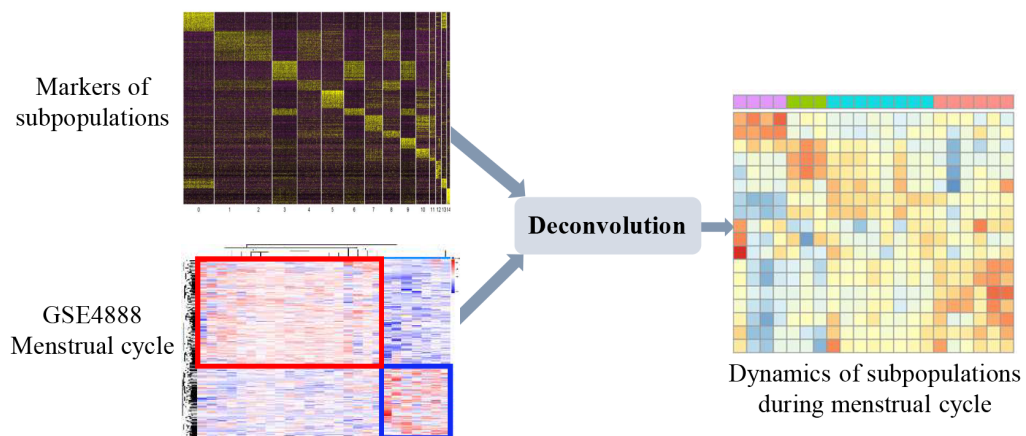

6  
7  
8  
9  
10  
11  
12  
13  
14  
15  
16

1 **Supplementary Figure S4. Human endometrium single cell sequencing verified**  
 2 **SFRP4+ stroma as proliferative phase specific endometrial cell populations. (a)**  
 3 UMAP plot of 5 uterus stroma cell sub-populations using Seurat. **(b)** Featureplot  
 4 depicted specific markers for each stroma sub-population (*SCGB1D2* for secretory  
 5 stroma cells; *SFRP4* for SFRP4+ stroma cells; *DCN* for two DCN+ stroma cells;  
 6 *ACTA2* for myofibroblast cells). **(c)** Different proportion of stromal subsets in different  
 7 phases during menstrual cycle.

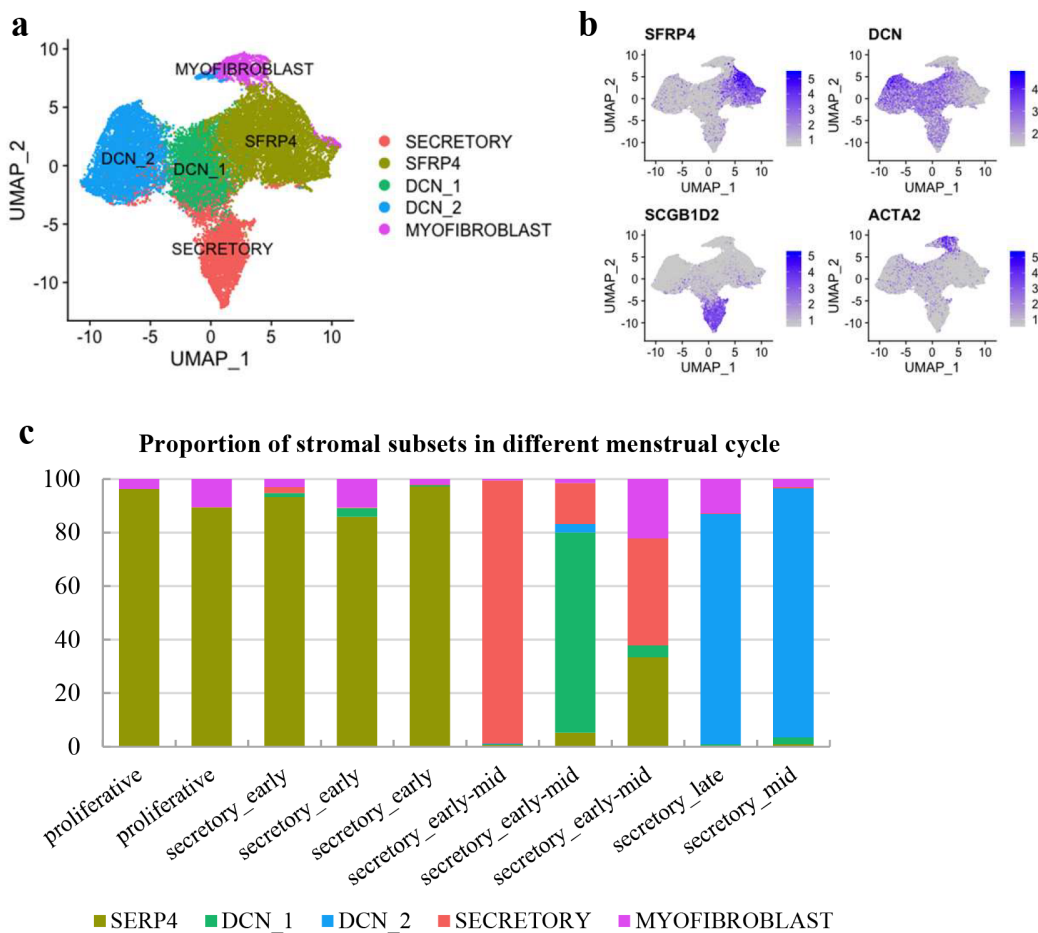

8

9

10

1 **Supplementary Figure S5. Spatial distribution of SFRP4 + stromal cells.**

2 Immunohistochemistry staining from the HPA showed the spatial distribution of SFRP4

3 + stromal cells in the functional endometrial layer close to the uterine cavity (a), and

4 basal endometrial layer close to the myometrium (b), SFRP4

5 (<https://www.proteinatlas.org/ENSG00000106483-SFRP4/tissue/endometrium#>),

6 Scale bar, 100  $\mu$ m.

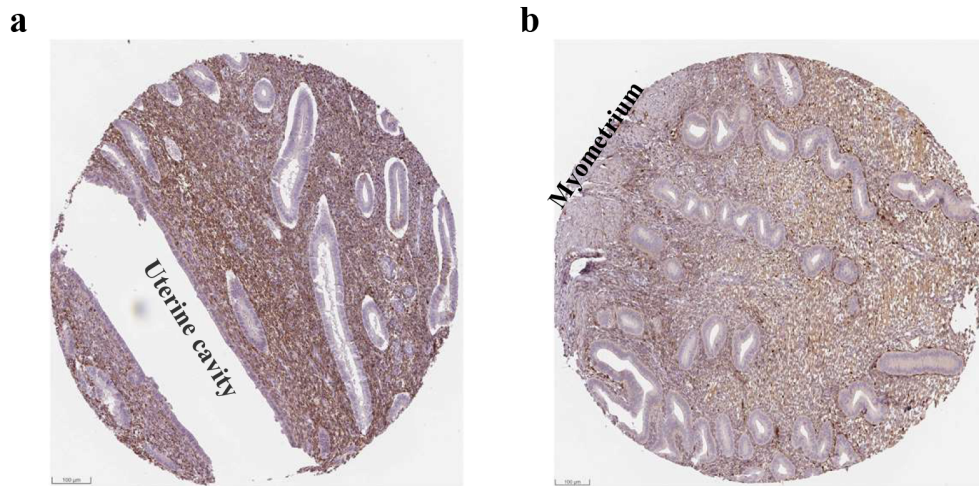

7

8

9

10

11

12

13

14

15



1 **Supplementary Figure S7. IGF1 promotes the proliferation and migration of**  
2 **endometrial epithelial cells. (a)** organoids culturing of endometrial epithelia cells with  
3 or without 100ng/ml IGF1 added in combination to generic organoid medium (ENR),  
4 scale bar=200 $\mu$ m. **(b)** Quantification of endometrial epithelial organoids in different  
5 groups, \*\*\*, p value<0.001; **(c)** radius of endometrial epithelial organoids in different  
6 groups, \*\*\*, p value<0.001. **(d-e)** Trajectory of endometrial epithelial cells monitored  
7 by CV1000 Live cell Imaging System. **(f)** velocity of endometrial epithelial cells, \*\*\*,  
8 p value<0.001.

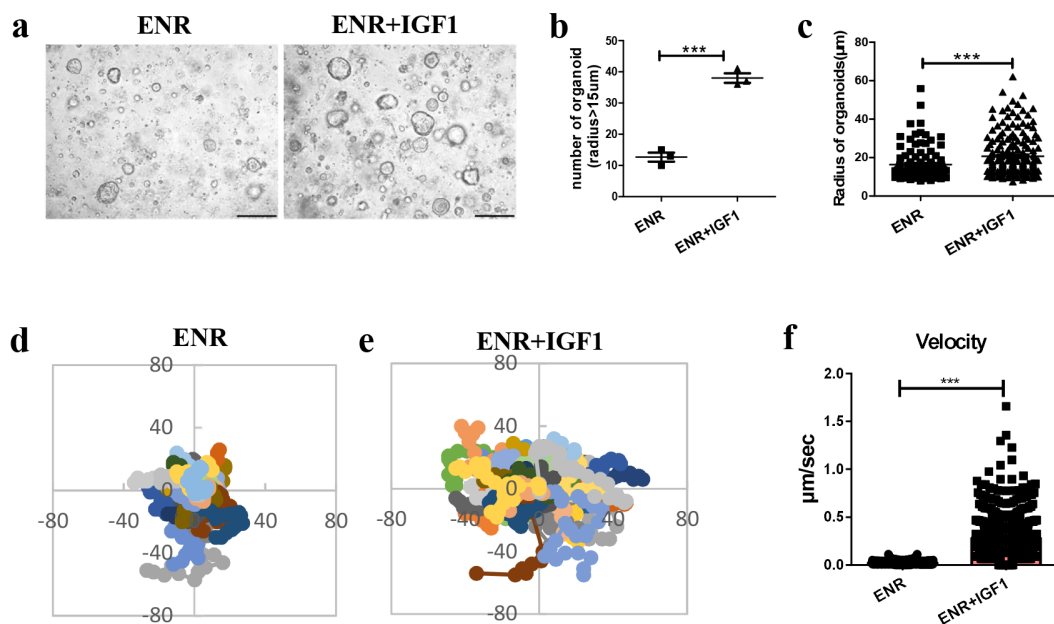

9  
10  
11  
12  
13  
14



1 **Supplementary Figure S8. The impact of IGF1 inhibition/knockdown on stromal**  
2 **cell proliferation and methods for quantifying organoid number and diameter. (a)**

3 Three different siRNA were designed according to different regions of the human *IGF1*  
4 mRNA (IGF1-si-1, IGF1-si-2, IGF1-si-3) to knock down *IGF1* in the SFRP4<sup>+</sup> stromal  
5 cells, 24 hours after transfection, QPCR was conducted to validated the efficiency of  
6 each siRNA, the results showed that both IGF1-si-1 and IGF1-si-3 could significantly  
7 knock down the expression of *IGF1* in the SFRP4<sup>+</sup> stromal cells, with the IGF1-si-3  
8 showed the best performance, so we chose IGF1-si-3 to do the rest of the experiments.

9 n=3, \*, p value<0.05. **(b)** The impact of IGF1 siRNA knockdown on stromal cell

10 proliferation. **(c)** The impact of IGF1 signaling inhibition using inhibitors on stromal

11 cell proliferation. n=6, \*p value<0.05, \*\*p value<0.01, \*\*\*p value<0.001. **(d)** The

12 endometrial epithelial organoid spheres in the pictures are automatically recognized

13 and selected with the count and measure objects function plug-in in Image-Pro Plus 6.0

14 (the red logo is the endometrial epithelial organoid automatically recognized by the

15 software), and the software calculates the number of epithelial organoids and the

16 diameter of each epithelial organoid ball at the same time for further statistical analysis.

17

18

19

20

21

22

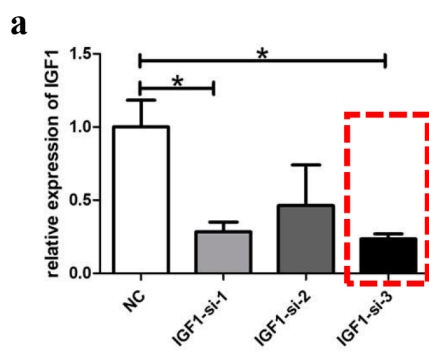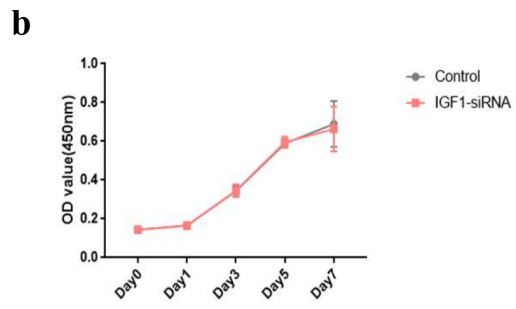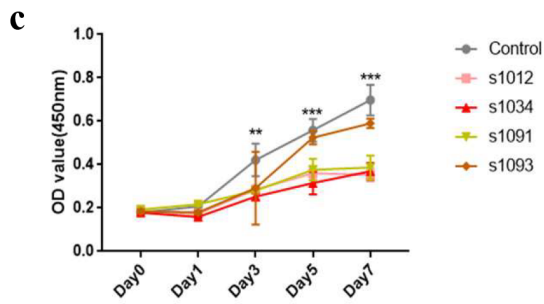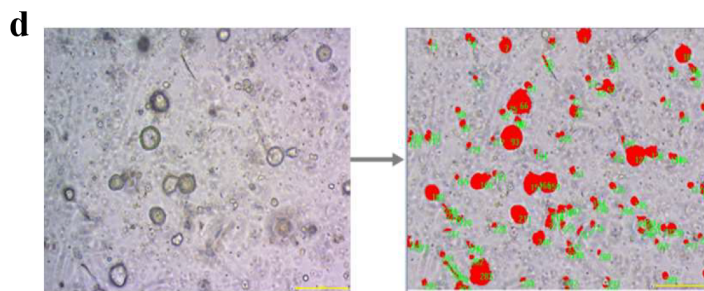

- 1
- 2
- 3
- 4
- 5
- 6
- 7
- 8
- 9
- 10

1 **Supplementary Figure S9. The endometrial injury model.** The endometrial injury  
2 model with endometrial layers torn off with the smooth muscle layer remained intact  
3 was performed as follows after animal anesthetized: a midline incision in the abdomen  
4 was made, and the uterus was exposed. In the injury alone group, A 1cm longitudinal  
5 incision was made on the opposite side of the mesometrium with the endometrial layer  
6 exposed. Then the endometrial layers with the size of 1cm in length and 0.5cm in width  
7 were torn off with the smooth muscle layer remained intact.

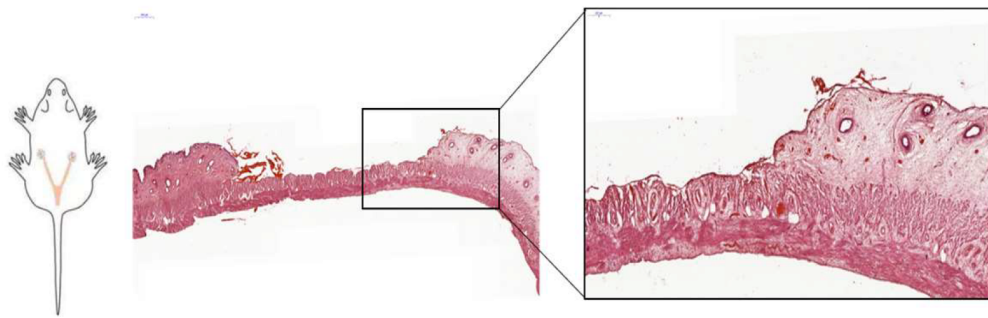

8  
9  
10  
11  
12  
13  
14  
15  
16  
17  
18

1 **Supplementary Figure S10. Characterization of GelMA.** (a) gelatinization after UV  
 2 irradiation for 15s; (b) <sup>1</sup>H-NMR spectra of gelatin and GelMA. (c) SEM (scanning  
 3 electron microscope) of GelMA; (d) cell viability of cells cultured in GelMA hydrogel,  
 4 in which the red was dead cell, green was living cell (2D:2 dimension image, 3D:3  
 5 dimension imaging); (e) The percentage of cell viability at different time points (\*\*, P  
 6 value<0.01, ns, no significance). (f) CCK8 testing of cell proliferation when cultured  
 7 in GelMA hydrogel extract.

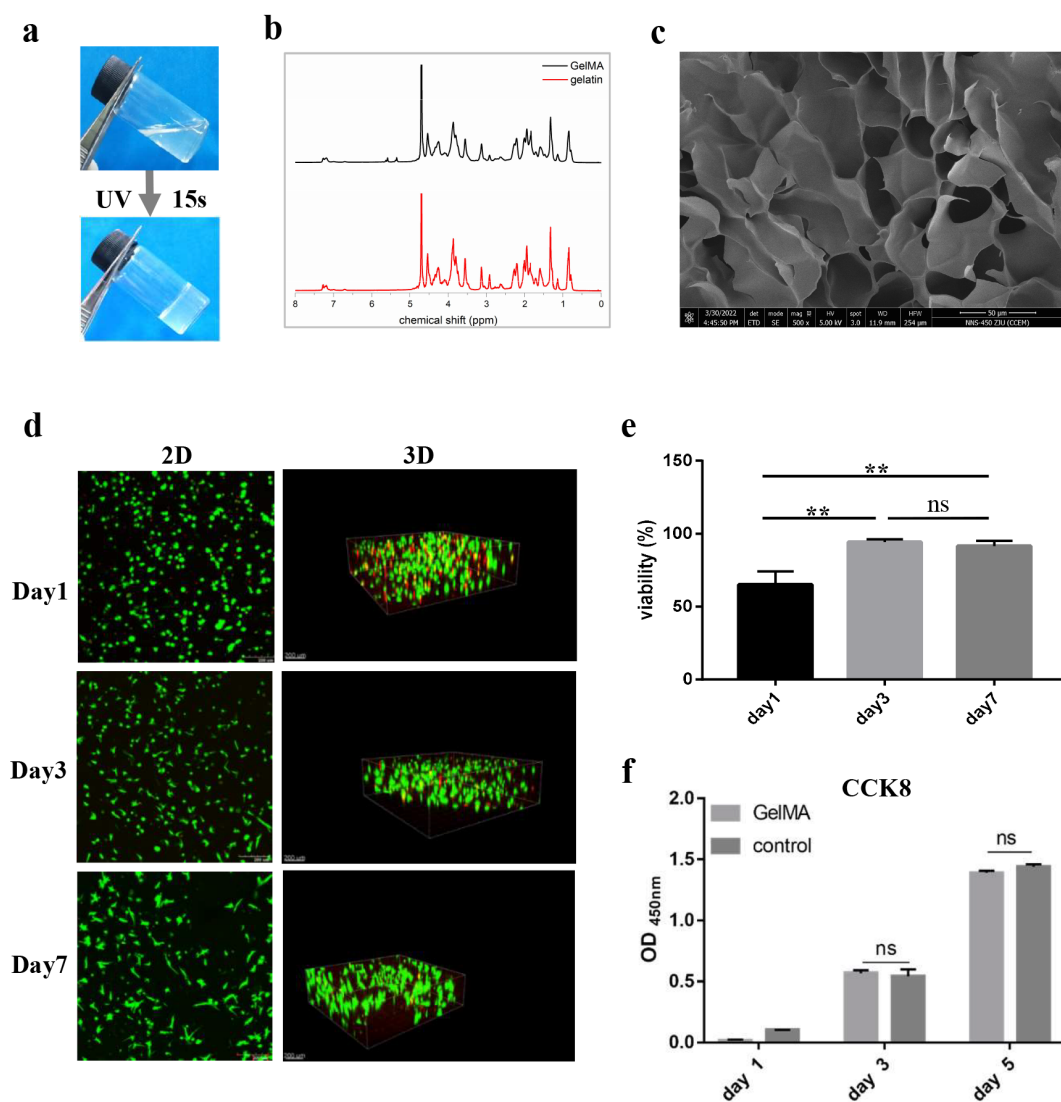

8

9

1 **Supplementary Figure S11. Marker expression in the subpopulations of in our**  
 2 **study. (a)** the expression of markers of the four epithelial clusters of the Nat Genet  
 3 2021 paper were mapped in our epithelial data. **(b)** the expression of markers of the  
 4 three fibroblast/stromal clusters in the Nat Genet 2021 paper were mapped in our  
 5 stromal cells data. **(c)** SUSD2 expression was highly enriched in our vascular cell  
 6 population (ADIRF+ vascular cells). **(d)** There's no positive SUSD2 expression in any  
 7 of the stroma cells in our data.

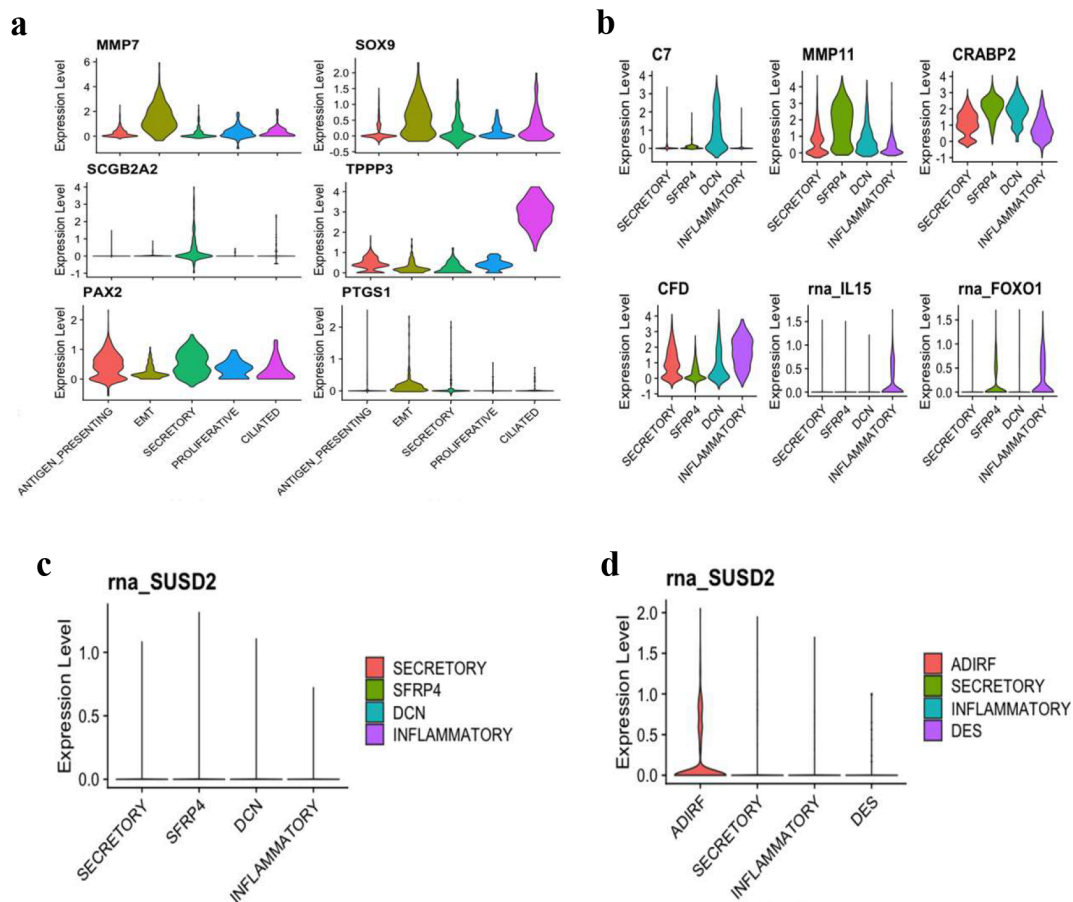

8

9

10

11

12

1 **Supplementary Tables:**

2 **Supplement table 1. Human full-thickness uterus specimen collection**

---

| Samples          | Age | Menstrual phase | Menstrual cycle (days) |
|------------------|-----|-----------------|------------------------|
| <b>Sample1*</b>  | 45  | Proliferative   | 25                     |
| <b>Sample2*#</b> | 46  | Proliferative   | 28-30                  |
| <b>Sample3</b>   | 51  | Proliferative   | 27                     |
| Sample4*         | 44  | Proliferative   | 25                     |
| Sample5*         | 49  | Proliferative   | 28                     |
| <b>Sample6*</b>  | 49  | Secretory       | 30                     |
| <b>Sample7</b>   | 44  | Secretory       | 25                     |
| <b>Sample8</b>   | 44  | Secretory       | 30                     |
| <b>Sample9*</b>  | 44  | Secretory       | 25-26                  |
| Sample10*        | 46  | Secretory       | 28                     |
| Sample11*        | 46  | Secretory       | 30                     |
| Sample12#        | 46  | Proliferative   | 20-30                  |

---

3 The samples marked in bold were used for single cell analysis. The samples marked  
4 with an asterisk were used for immunofluorescence analysis. The samples marked with  
5 # indicated cell isolations for organoid experiments.

6

7

8

9

10

11

12

13

1 **Supplementary Table S2. Specific markers of each of the main cluster of the**  
2 **human uterus**

3 **Supplementary Table S3. Gene ontology of the specific markers of each of the**  
4 **main cluster of the human uterus**

5 **Supplementary Table S4. Specific markers of each of the epithelial sub-population**  
6 **of the human uterus**

7 **Supplementary Table S5. Gene ontology of the specific markers of each of the**  
8 **epithelial sub- population of the human uterus**

9 **Supplementary Table S6. Specific markers of each of the stromal sub-population**  
10 **of the human uterus**

11 **Supplementary Table S7. Gene ontology of the specific markers of each of the**  
12 **stromal sub- population of the human uterus**

13 **Supplementary Table S8. Specific markers of each of the endothelial sub-**  
14 **population of the human uterus**

15 **Supplementary Table S9. Gene ontology of the specific markers of each of the**  
16 **endothelial sub- population of the human uterus**

17 **Supplementary Table S10. Specific markers of each of the vascular muscle sub-**  
18 **population of the human uterus**

19 **Supplementary Table S11. Gene ontology of the specific markers of each of the**  
20 **vascular muscle sub-population of the human uterus**

21 **Supplementary Table S12. Specific markers of each of the immune cell sub-**  
22 **population of the human uterus**

23 **Supplementary Table S13. Gene ontology of the specific markers of each of the**  
24 **immune cell sub-population of the human uterus**

25 **Supplementary Table S14. Specific markers of each of the myometrial muscle cell**  
26 **sub-population of the human uterus**

27 **Supplementary Table S15. Gene ontology of the specific markers of each of the**  
28 **myometrial muscle cell sub-population of the human uterus**

29 **Supplementary Table S16. Significant connections of ligand-receptor pairs from**  
30 **cell sub- populations from the proliferative phase of the human uterus. This table**  
31 **provides the list of ligand-receptor interactions pairs between each two sub-populations**  
32 **from the ecosystem of the proliferative phase of the human uterus**

33 **Supplementary Table S17. Significant connections of ligand-receptor pairs from**

1 **cell sub- populations from the secretory phase of the human uterus.** This table  
2 provides the list of ligand-receptor interactions pairs between each two sub-populations  
3 from the ecosystem of the secretory phase of the human uterus  
4
